# Supplementary material for: Effect of a scramblase activator upon lipid and probe scrambling and membrane domain formation in HEK 293T cells
Source: Royal Society of Chemistry journal article supplement (doi:10.1039/d4fd00211c), 2025-01-01
Supplement: d4fd00211c1.pdf [file d4fd00211c1.pdf]

## Supplementary Material for: Effect of a scramblase activator upon scrambling and membrane domain formation in HEK293T cells.

Shinako Kakuda and Erwin London

### Supplemental Figures and Table

**Supplemental Figure 1. Images of HEK293T cells stained with the calcium indicator Fluo-4 AM in the presence and absence of  $\text{Ca}^{2+}$  and BrA. See methods for details.**

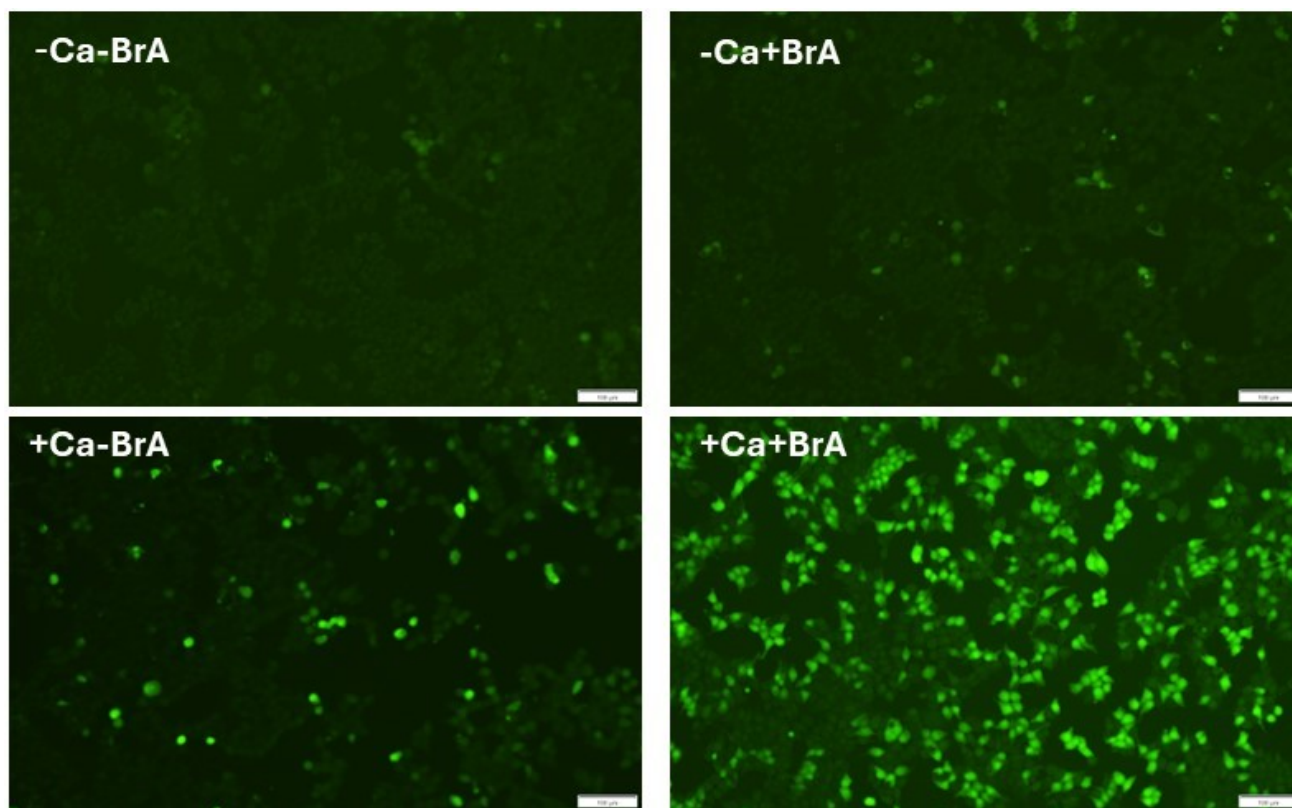

**Supplemental Figure 2.** Time course of the effect of BrA upon 6NBD-PC reduction by dithionite. Left, after BrA addition but without pre-extraction of plasma membrane outer leaflet 6NBD-PC by BSA. Right, after pre-extraction of plasma membrane outer leaflet 6NBD-PC by BSA followed by BrA addition. 25 mM sodium dithionite was added at time zero. Conditions as in Figure 2. Y-axis gives the fraction of initial 6NBD-PC fluorescence, i.e. before dithionite was added. Notice that without BrA addition the reduction levels are similar with and without preextraction by BSA, suggesting 6NBD-PC is almost all in the outer leaflet.

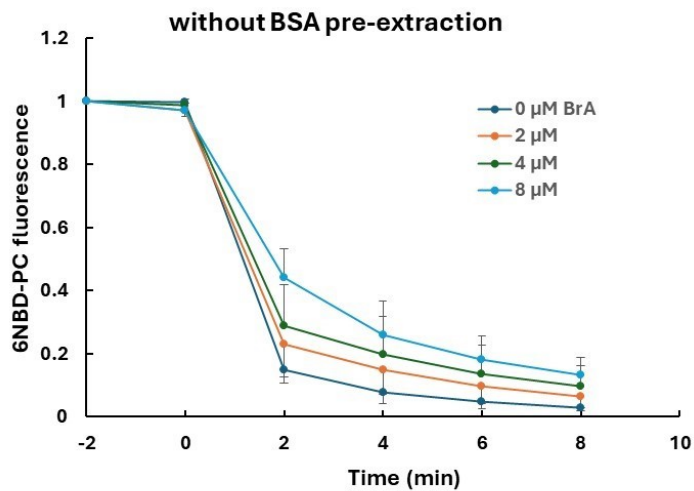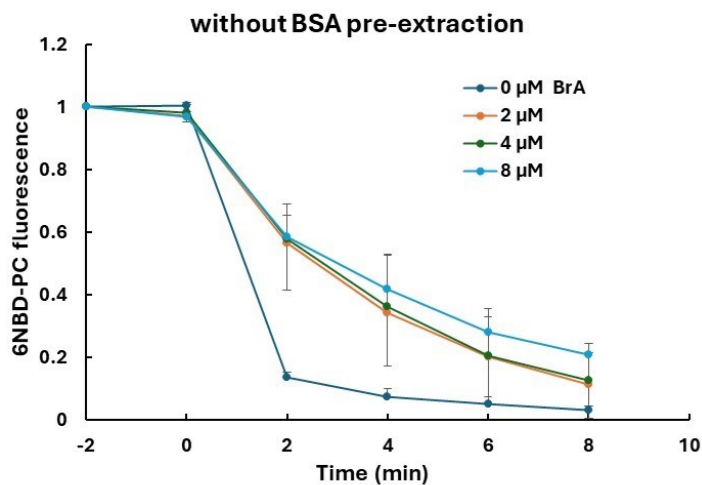

**Supplemental Figure 3:** Effect of calcium on dissociation of ODRB from HEK293T cells in the presence of 8  $\mu$ M BrA. See methods for details. Sup = supernatant after centrifugation. ppt = cell pellet. Fluorescence is in arbitrary units. Results from n=4 and standard deviations are shown.

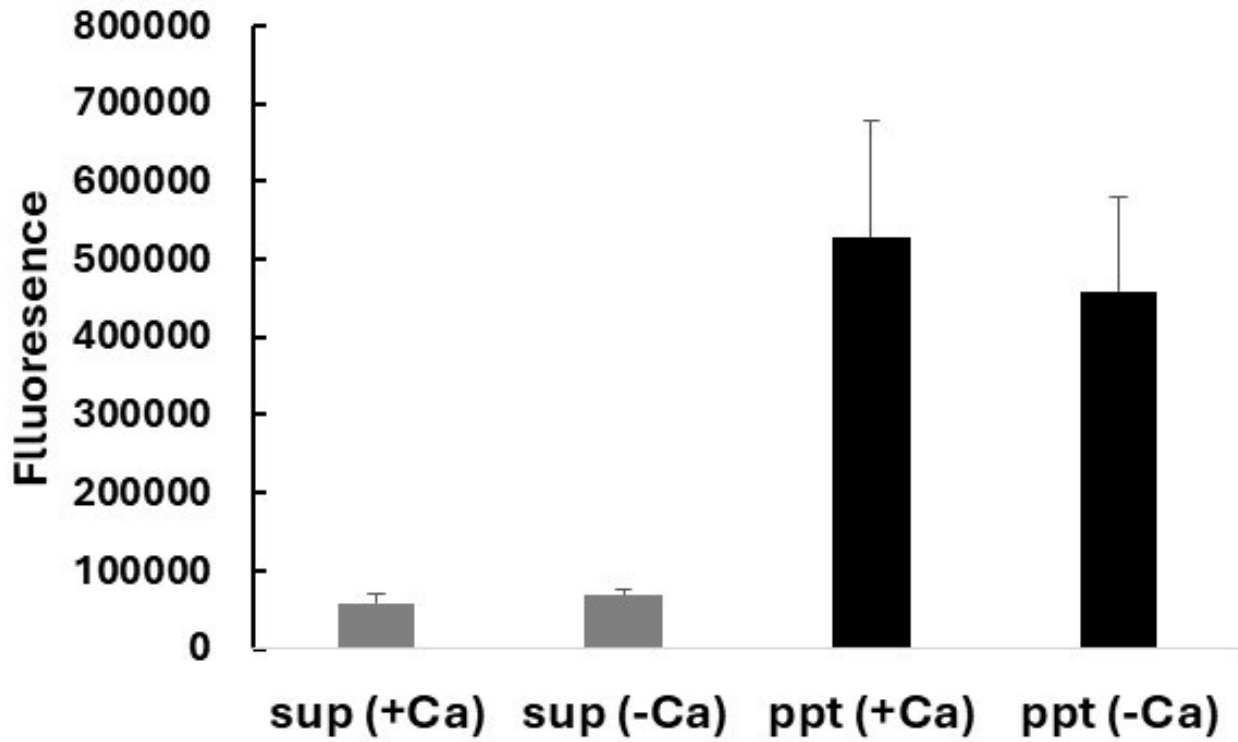

**Supplemental Figure 4:** Effect of  $\text{Ca}^{2+}$  upon FRET between TMADPH and ODRB in lipid vesicles composed of 1:1:1 SM:DOPC:cholesterol. Samples without  $\text{Ca}^{2+}$  also contained 0.4 mM EGTA. Results from  $n=3$  and standard deviations are shown.

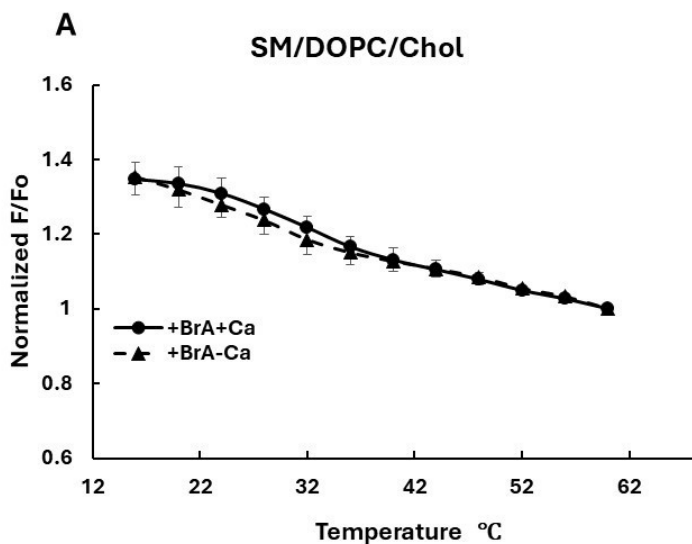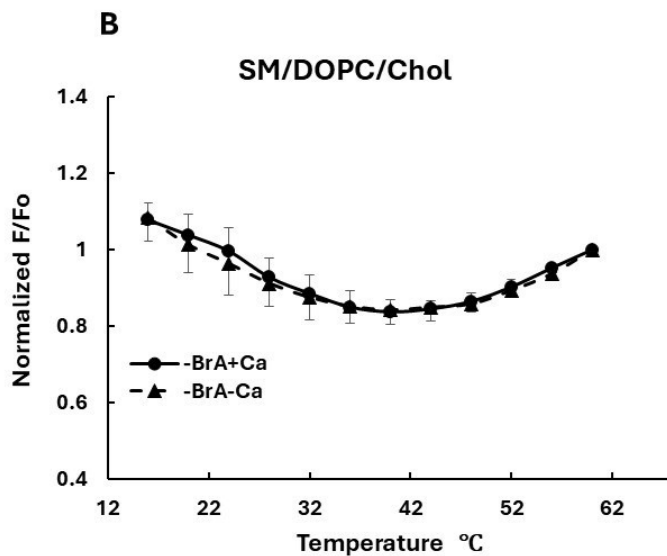

**Supplemental Figure 5:** Effect of addition of BrA on FRET between TMADPH and ODRB in lipid vesicles composed of 1:1:1 SM:DOPC:cholesterol. Samples lacking  $\text{Ca}^{2+}$  also contained 0.4 mM EGTA. BrA added at  $t=0$ . Results from  $n=3$  and standard deviations are shown. For the samples with  $\text{Ca}^{2+}$ ,  $F/F_0$  at time = 0 was  $0.532 \pm 0.034$ . For samples with  $\text{Ca}^{2+}$ ,  $F/F_0$  at time = 0 was  $0.403 \pm 0.010$ .

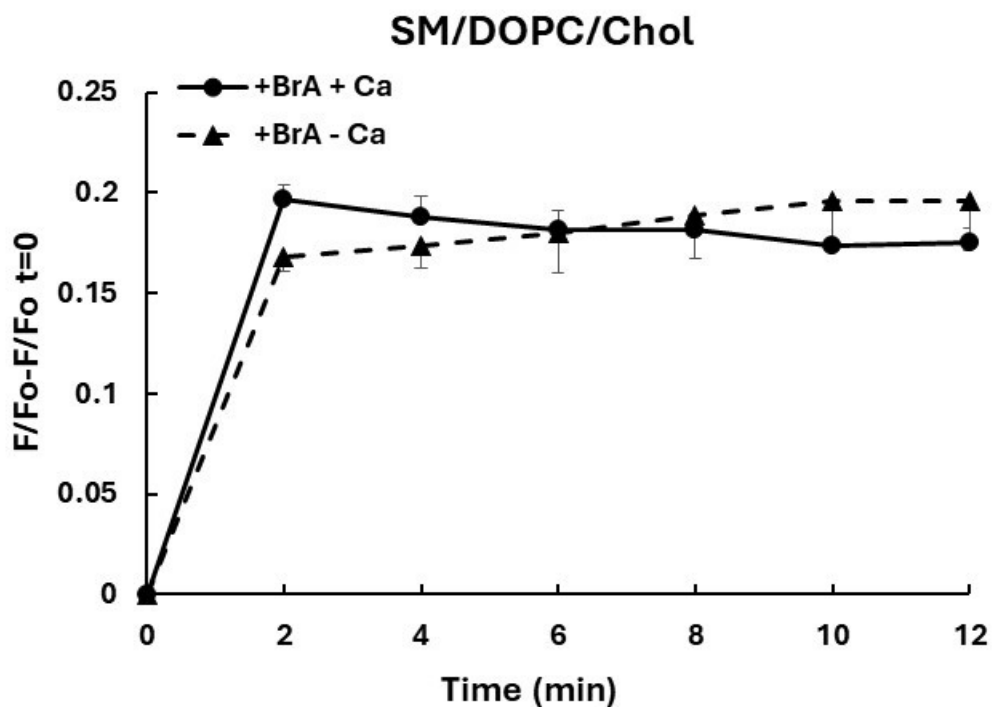

**Supplemental Table 1.** Raw F/F<sub>0</sub> values at t = 0 for the samples shown in Figure 4.

|                              | 2 $\mu$ M BrA     | 4 $\mu$ M BrA     | 8 $\mu$ M BrA     |
|------------------------------|-------------------|-------------------|-------------------|
| Figure 4A                    | 0.294 $\pm$ 0.034 | 0.277 $\pm$ 0.036 | 0.212 $\pm$ 0.008 |
| Figure 4B                    |                   | 0.423 $\pm$ 0.038 | 0.361 $\pm$ 0.021 |
| Figure 4C - Ca <sup>2+</sup> |                   |                   | 0.448 $\pm$ 0.062 |
| Figure 4C + Ca <sup>2+</sup> |                   |                   | 0.448 $\pm$ 0.146 |
